# Supplementary material for: activin-2 is required for regeneration of polarity on the planarian anterior-posterior axis
Source: PubMed Central journal article supplement (PMC8057570; doi:10.1371/journal.pgen.1009466), 2021-03-29

**Supplemental Figure 2**

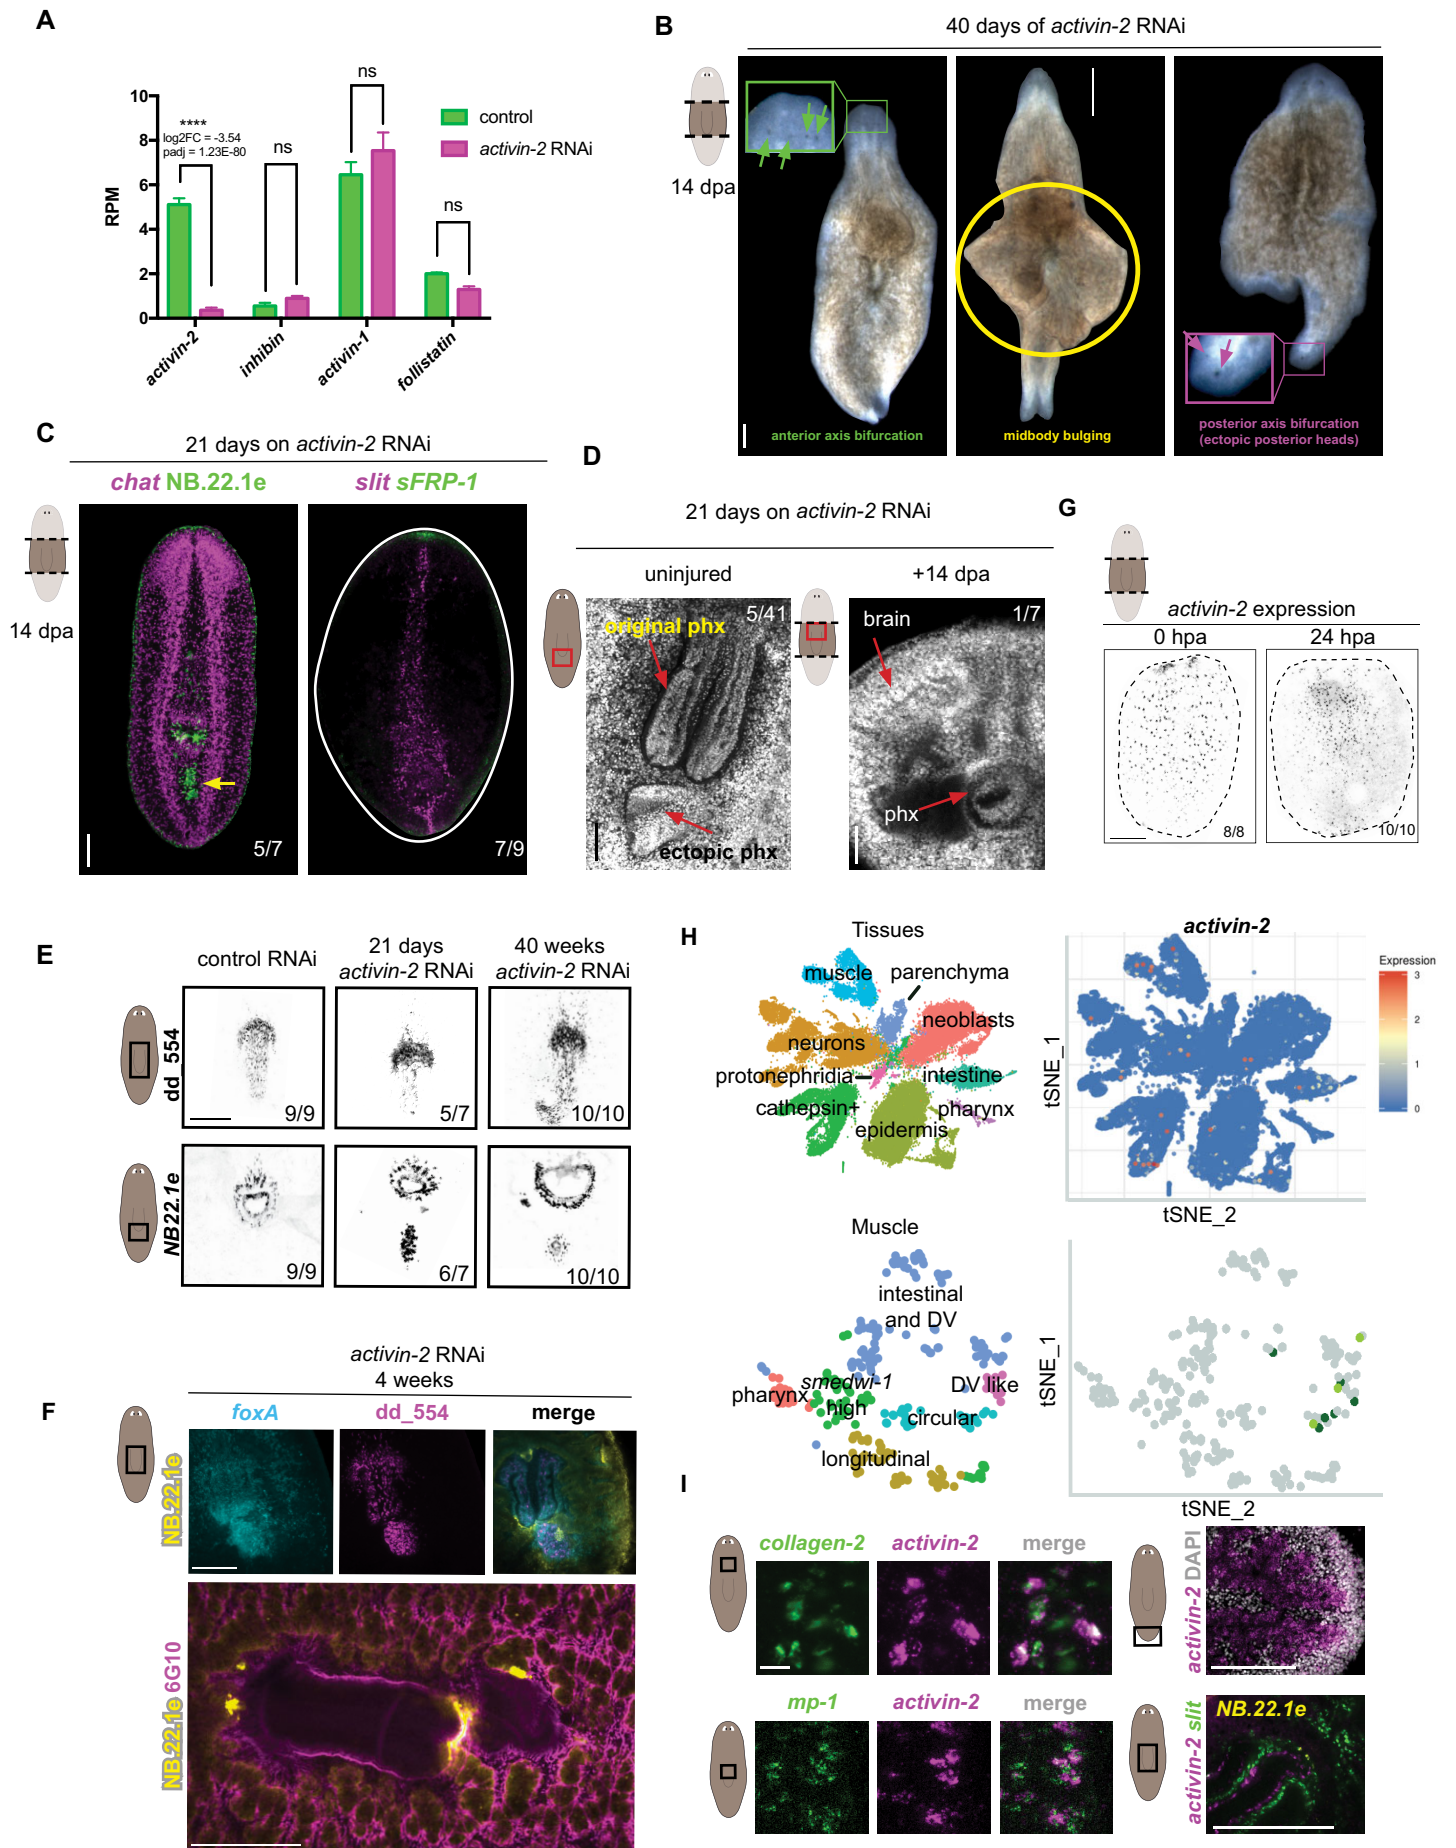

Supplement: pgen.1009466.s002.pdf [file pgen.1009466.s002.pdf]
